# Supplementary material
Source: publisher figshare collection journal article supplement (https://sage.figshare.com/ndownloader/files/18514148)
Supplement: Supplementary file 1 [file 18514148]

## Supplemental Appendix

Table A1: Summary statistics for dependent variables

|                                              | Overall |      | Christian |      | Muslim |      |                             |
|----------------------------------------------|---------|------|-----------|------|--------|------|-----------------------------|
|                                              | N       | pct  | N         | pct  | N      | pct  |                             |
| Experienced discrimination (Table 1)         |         |      |           |      |        |      |                             |
| no                                           | 6,567   | 80.5 | 3,024     | 87.6 | 1,700  | 66.6 |                             |
| yes                                          | 1,526   | 18.7 | 402       | 11.7 | 819    | 32.1 | Universe for tables 2 and 3 |
| missing                                      | 68      | 0.8  | 25        | 0.7  | 34     | 1.3  |                             |
| Reactions to Discrimination (Tables 2 and 3) |         |      |           |      |        |      |                             |
| lost confidence                              |         |      | 168       | 42.2 | 302    | 36.9 |                             |
| lost interest                                |         |      | 167       | 41.8 | 340    | 41.6 |                             |
| gained motivation                            |         |      | 174       | 43.5 | 434    | 53.3 |                             |

The question wording for the items was as follows:

I) For experiences of discrimination:

Do you think you were treated differently from other students...?

- a) Concerning Grading
- b) When it was time to decide career orientation
- c) Concerning discipline and punishment
- d) Concerning the way you were addressed

Answer possibilities are 'Treated Better', 'Same', 'Less well Treated'. Mention of less well treated on any item is coded as having experienced discrimination.

II) Reactions to discrimination

"What effect did this unfavorable treatment [...] have on you?"

- a) You lost confidence in yourself
- b) You became disinterested in school
- c) It motivated you to succeed in your studies

Table A2: Descriptive Statistics - Independent Variables

|                                                         | Freq. | Pct. |                                               | Freq. | Pct. |
|---------------------------------------------------------|-------|------|-----------------------------------------------|-------|------|
| Religion growing up                                     |       |      | Gender                                        |       |      |
| non-religious                                           | 966   | 12   | Female                                        | 4,271 | 52   |
| Christian                                               | 3,451 | 42   | Male                                          | 3,890 | 48   |
| Muslim                                                  | 2,553 | 31   | Parental education (highest)                  |       |      |
| All others                                              | 1,191 | 15   | No Formal education                           | 1,074 | 13   |
| ....Different religion                                  | 458   | 6    | Primary                                       | 2,326 | 29   |
| ....parents of mixed religions                          | 371   | 5    | Lower Secondary                               | 1,163 | 14   |
| ... Information missing on at least one parent          | 362   | 4    | Upper Secondary                               | 2,141 | 26   |
| Region of Origin                                        |       |      | Tertiary                                      | 977   | 12   |
| Northern Africa (Tunisia, Algeria, Morocco)             | 2,477 | 30   | missing                                       | 480   | 6    |
| Southern Europe (Portugal, Italy, Spain...)             | 2,598 | 32   | Type of school                                |       |      |
| Sub-Saharan Africa (Senegal, Sahel, Central Africa....) | 976   | 12   | always public                                 | 6,152 | 75   |
| Southeast Asia (Vietnam, Laos, Cambodia...)             | 655   | 8    | always private                                | 239   | 3    |
| Other European countries                                | 838   | 10   | both public and private                       | 1,681 | 21   |
| Turkey                                                  | 448   | 5    | missing                                       | 89    | 1    |
| Other                                                   | 169   | 2    | Attended school outside neighborhood          |       |      |
| Importance of religion growing up                       |       |      | No                                            | 6,369 | 78   |
| not at all important                                    | 1,961 | 24   | Yes                                           | 1,703 | 21   |
| a bit                                                   | 2,243 | 27   | missing                                       | 89    | 1    |
| somewhat important                                      | 1,818 | 22   | Went to school abroad                         |       |      |
| very important                                          | 2,061 | 25   | No                                            | 7,629 | 93   |
| missing                                                 | 78    | 1    | Yes                                           | 525   | 6    |
| Language in home when growing up                        |       |      | missing                                       | 7     | 0    |
| French only                                             | 3,178 | 39   | Share of school that had immigrant background |       |      |
| mostly French                                           | 882   | 11   | Almost all                                    | 413   | 5    |
| both                                                    | 2,541 | 31   | Over Half                                     | 1,307 | 16   |
| mostly other                                            | 512   | 6    | Half                                          | 1,820 | 22   |
| other only                                              | 1,048 | 13   | lt Half                                       | 2,447 | 30   |
| Visits to the parental home country                     |       |      | Almost None                                   | 1,820 | 22   |
| No                                                      | 1,887 | 23   | missing                                       | 354   | 4    |
| Yes                                                     | 3,138 | 38   | Continuous Variable                           | mean  | Sd   |
| Frequently                                              | 3,136 | 38   | Age                                           | 30.4  | 9.2  |
| Birth place of parents                                  |       |      |                                               |       |      |
| Both foreign born (2 <sup>nd</sup> generation)          | 4,640 | 57   |                                               |       |      |
| One French born (2.5 generation)                        | 3,521 | 43   |                                               |       |      |
